# Supplementary material for: Bacteriophages Combined With Subtherapeutic Doses of Flucloxacillin Act Synergistically Against Staphylococcus aureus Experimental Infective Endocarditis
Source: PubMed Central journal article supplement — J Am Heart Assoc. 2022 Jan 19;11(3):e023080. doi: 10.1161/JAHA.121.023080 (PMC9238497; doi:10.1161/jaha.121.023080), 2022-01-19

# **Supplemental Material**

## Data S1. SUPPLEMENTAL METHODS

### **Bacterial strains, growth conditions, and antibiotic susceptibility testing.**

The MSSA strain Laus102, which was isolated from a healthy carrier <sup>16</sup>, and a panel of 62 *S. aureus* strains that had been previously isolated from humans and cows were used in this study (Supplemental Table 1). All *S. aureus* strains were stored in TSB (BD Difco™, Becton Dickinson, Sparks, MD) containing 10% (v/v) glycerol at -80 °C and sub-cultured on TSA plates to ensure purity before testing. For liquid cultures, TSB was inoculated with at least five single colonies and incubated for 24 h with agitation (200 rpm) at 37 °C.

The *P. aeruginosa* strain ATCC® 15442™ (LGC Standards, Molsheim, France) was stored in Lysogeny Broth (LB, BD Difco™, Becton Dickinson, Sparks, MD) containing 10% (v/v) glycerol at -80 °C and sub-cultured on LB agar plates to ensure purity before testing. For liquid cultures, LB was inoculated with at least five single colonies and incubated for 24 h with agitation (200 rpm) at 37 °C.

Flucloxacillin was purchased from OrPha Swiss (Küsnacht, Switzerland). The MICs of flucloxacillin were determined in Muller Hilton Broth (Becton Dickinson, Sparks, MD) using a standard micro-dilution procedure <sup>51</sup>.

### **Bacteriophages.**

The *Podoviridae* phage 66 and *Herelleviridae* phage vB\_SauH\_2002 genomes are publicly available (Genbank accession no. NC\_007046 and MW528836, respectively) <sup>17</sup>. To produce large quantities of phages, amplification was performed using Laus102 as propagation strain. For each phage preparation, 2 L of TSB was inoculated 1:100 with 20 mL of an overnight culture of Laus102 and incubated at 37 °C under 200rpm until an OD<sub>595nm</sub> of 0.1 was reached, and then 1 mL of phage stock (10<sup>10</sup> PFU/mL) was added. The culture was further incubated at 37 °C under 200 rpm for 6 h, and then centrifuged twice at 8000 ×g for 15 min to remove bacterial debris. The supernatant containing the phages was passed through 0.22-µm filters (vacuum filtration 1000 rapid-filtermax, Techno Plastic Products AG, Trasadingen, Switzerland). The filtrate was further concentrated to 100 mL and buffer exchanged against 3 L of 1× phosphate buffer saline (PBS), pH 7.4 using tangential flow filtration through an mPES/500 KD column (Repligen, Waltham, MA). Phage concentrations in the

purified batches were determined in classical double agar overlay assays (DLAs)<sup>52</sup>. Briefly, 200 µL of an overnight culture of Laus102 was mixed with 100 µL of serial dilution of the phage preparations and 5 mL of TSB soft agar at 45 °C. This mixture was poured on TSA plates and incubated at 37 °C overnight after the TSB soft-agar layer solidified at room temperature. Concentration of phages was determined by counting PFUs. The equimolar phage cocktail at 10<sup>10</sup> PFU/mL was assembled after adjusting the concentration of each phage to 10<sup>10</sup> PFU/mL and by mixing equal volumes of the phages.

Phage vB\_PaeM\_4002 is a *Myoviridae* previously isolated from a sewage water sample collected at the Vidy wastewater treatment plant in Lausanne, Switzerland (unpublished) using *P. aeruginosa* PAO1 as a host strain. It is similar to the lytic phage vB\_Pae\_Ps44 (Genbank accession no. NC\_028939). vB\_PaeM\_4002 was purified following the procedure described above, except that the propagation host used was *P. aeruginosa* strain ATCC® 15442™.

#### **Electron microscopy.**

Four-microliter phage suspension samples were deposited on a lacey carbon copper grid (EMS, Hatfield, PA) previously glow discharged for 30 s at 15 mA. The deposition was conducted in a Vitrobot Mark IV chamber (Thermo Fisher Scientific, Waltham, MA) in 100% humidity. A blotting time of 5 s with a force of -16 was used just before plunge freezing in liquid ethane. The grid was then transferred in an Elsa cryo-transfer holder (Gatan, Pleasanton, CA) and inserted in a 2100 Plus electron microscope (Jeol, Tokyo, Japan). Images (magnification, 120k; pixel size, 0.097 nm; 1-s exposure time) were collected by an XF416 camera (TVIPS GmbH, Gauting, Germany) with SerialEM software at 200 kV (electron dose of 25e<sup>-</sup>/Å<sup>2</sup>/s)<sup>53</sup>.

#### **Determination of phage host range and efficiency of plating.**

Phage host range was determined on various *S. aureus* strains (Supplemental Table S1) using DLA (see above). Efficiency of plating scores were determined by dividing the phage titer in PFU/mL obtained on the tested strain by the phage titer obtained on the amplification strain Laus102<sup>54</sup>. All experiments were done in triplicate.

#### ***In vitro* turbidity assays.**

One hundred  $\mu\text{L}$  of an overnight culture of Laus102 were re-suspended in 10 mL of TSB and incubated at 37 °C under 200 rpm until the  $\text{OD}_{595\text{nm}}$  reached 0.6, corresponding to  $\sim 10^8$  CFU/mL. Then, 10- $\mu\text{L}$  samples of this bacterial suspension ( $10^6$  CFU) were mixed in 96-well plates (Thermo Scientific, USA) with 280  $\mu\text{L}$  of TSB and 10  $\mu\text{L}$  of various dilutions of the phage solutions to achieve final MOIs of 0.01, 0.1, 1, 10, and 100. The microtiter plates were incubated at 37 °C in an Elx808IU absorbance microplate reader (BioTek®, Sursee, Switzerland) and the  $\text{OD}_{595\text{nm}}$  was recorded every 10 min for 24 h. The microplates were shaken for 3 s before each measurement. All experiments were performed in triplicate.

### **Phage time-kill curve assays.**

One hundred- $\mu\text{L}$  samples of an overnight culture of Laus102 were re-suspended in 10 mL of TSB and incubated at 37 °C under 200 rpm until the  $\text{OD}_{595\text{nm}}$  reached 0.6, corresponding to  $\sim 10^8$  CFU/mL. The culture was diluted 1:100 in 10 mL of fresh TSB supplemented with either the equimolar phage cocktail at a final MOI of 1, flucloxacillin at 1 $\times$  the MIC, or a combination of both at the same final concentrations and then incubated at 37 °C and 200 rpm. Cell viability was determined 0 h, 2 h, 4 h, and 24 h after inoculation (limit of detection  $10^2$  CFU/mL). Before plating, samples were diluted in 1 $\times$  PBS (pH 3) to neutralize the phages. All experiments were performed in triplicate. A similar procedure was used to test vB\_Pae\_4002 on *P. aeruginosa* strain ATCC® 15442™.

For the experiments in the presence of plasma, 100- $\mu\text{L}$  samples of an overnight culture of Laus102 or *P. aeruginosa* strain ATCC® 15442™ were re-suspended in 10 mL of TSB or LB, respectively, and incubated at 37 °C under 200 rpm until the  $\text{OD}_{595\text{nm}}$  reached 0.6, corresponding to  $\sim 10^8$  CFU/mL. The culture was diluted 1:100 in 10 mL fresh TSB or LB supplemented 10% rat plasma (Sigma-Aldrich Chemie GmbH, Buchs, Switzerland). After a 30-min pre-incubation at room temperature, *S. aureus* phage cocktail or phage vB\_Pae\_4002 (each at MOI = 100) was added accordingly, and test tubes were placed at 37 °C and 200rpm. Cell viability was determined 0 h, 2 h, and 4 h after initiation of the phage challenge (limit of detection  $10^2$  CFU/mL). Before plating, samples were diluted in 1 $\times$  PBS (pH 3) to neutralize the phages. All experiments were performed in triplicate.

### ***In vitro* S. aureus mono-species biofilm assay.**

*Maturation of the biofilm.* MSSA Laus102 biofilms were produced in 96-well plates as previously described<sup>18</sup>. Briefly, overnight cultures were diluted 1:100 in TSB, and 100- $\mu$ L samples of the subsequent solution containing ca.  $10^7$  CFU/mL were used to inoculate 96-well polystyrene plates (Greiner Bio-One, Kremsmünster, Austria) (final concentration of bacteria  $\sim 10^6$  CFU per well). After a 24-h incubation at 37 °C without shaking, the supernatant was removed from each well, and the remaining adherent biofilm was carefully steam-washed for 45 min using the BiofilmCare™ technology procedure<sup>18</sup>.

*Treatment of biofilm.* Mature biofilms were treated for 24 h at 37 °C with  $10^8$  PFU/mL,  $10^9$  PFU/mL, or  $10^{10}$  PFU/mL (final MOIs = 1, 10, and 100, respectively) of phage vB\_SauH\_2002 alone, phage 66 alone, the phage cocktail, or flucloxacillin (1 $\times$  or 10 $\times$  MIC). In addition, the phage cocktail at all MOIs was evaluated in combination with both flucloxacillin concentrations.

*Evaluation of treatment efficacy.* The treated biofilms were rinsed two times with PBS and re-suspended in 100  $\mu$ l of PBS by scraping the wells with sterile pipette tips. The 96-well microplate was sealed with a plastic film (Dutscher, Brumath, France), put in an ultrasound bath (Bactosonic, Bandelin electronic GmbH & Co.KG, Berlin, Germany) for 10 min at 40 Hz to detach attached bacteria and to remove clusters before determination of viable counts on TSA.

#### **Additional information related to the EE model.**

*Randomization.* Randomization of animals in groups was done using the online tool Research Randomizer (<https://www.randomizer.org/>).

*Flucloxacillin dosing regimen.* Rats received a suboptimal IV dose of flucloxacillin mimicking human kinetic treatment (2 g every 12 h for 24 h instead of 2 g every 6 h for 24 h for an optimal treatment). The administration protocol consisted in the infusion of a solution of flucloxacillin (0.3 g/10 mL in saline) according to the following cycle: 2.0mL/h for 15 min., followed by 0.4 mL/h for 1 h 45 min., 0.2 mL/h for 2 h, and 0.005 mL/h for 2 h. After this first 6 h infusion cycle, no treatment was given for 6 h and a second infusion cycle was performed thereafter followed by no treatment for 6 h before euthanasia.

*Criteria for euthanasia.* Animal welfare was assessed at least two times per day with an in-house welfare score sheet for rodents (see below). Animals were excluded from randomization if we

suspected that the catheter placed into the heart through the carotid artery had potentially damaged the aortic valve or was not properly inserted. Animals were euthanized humanely according to the score and status of the animal as indicated below (termination criteria). The mortality rate after surgery was 10%, and six rats were excluded before infection. Moreover, six rats were further excluded at the end of the experiment because the catheter was not properly inserted.

Welfare score sheet used in the *in vivo* experiment of EE rats.

|          | Score                  |                                             |                                                           |                                     |
|----------|------------------------|---------------------------------------------|-----------------------------------------------------------|-------------------------------------|
|          | 0                      | 1                                           | 2                                                         | 3                                   |
| Haircoat | Normal<br>Well groomed | Fur ruffling                                | General lack of grooming                                  | Hunched up with matted fur          |
| Posture  | Normal                 | Sporadic hunchback posture                  | Frequent hunchback posture                                | Head on cage floor                  |
| Activity | Normal                 | Decreased activity after slight stimulation | Significant decreased activity after moderate stimulation | Lethargy after moderate stimulation |
| Breath   | Normal                 | Shallow                                     | Labored breathing                                         | Breathing noises                    |
| Behavior | Normal                 | Isolated from cage mates*                   |                                                           | Convulsion                          |

**Termination criteria:**

Score of 0: no action.

Score of 1: animal is observed twice daily. If animal does not return to normal within 48 hours it will be euthanized.

Score of 2: animal is observed three times daily. If animal does not return to normal within 12 hours it will be euthanized.

When an animal reaches a score of 3, either cumulative or in one observable criteria, it will be immediately euthanized.

\*this score is not applicable for animals that are isolated in a cage, for instance animals equipped with a "swivel" system.

*Blinding procedure.* The rats receiving saline and phages or saline and antibiotics were connected to the same pumps, rendering the masking of group/treatment assignment challenging and unnecessary since blinding was performed during outcome assignment. Indeed, the technician who performed the experiments to evaluate the bacterial and phage loads in vegetations, and organs was blinded, i.e. she didn't know from which animal the samples we provided her originated from.

*Bacterial loads in cardiac vegetations.* The presence of macroscopic cardiac valve vegetations was visually validated before being dissected from the heart. After being weight, vegetations were further mechanically homogenized in 1 mL saline. The homogenates were serially diluted and plated in triplicate on TSA plates for bacterial counting. Colonies were counted after an overnight incubation at 37 °C. Remaining vegetation homogenates were stored at -80 °C after the addition of 10% (v/v) glycerol. Phage or flucloxacillin carry over was diluted out through serial dilutions.

*Phage loads in cardiac vegetations, organs, and blood.* After dissection, organs were mechanically homogenized in weight-adapted volumes of saline (1 mL for cardiac vegetations, 2 mL for spleen,

liver, and kidney). Phage loads were determined using a classical DLA (see Materials and Methods). Plates were incubated at 37 °C and plaques were counted the following day.

*Power calculation.* We hypothesized that 100% and 30% of the placebo and phage cocktail/flucloxacillin treated rats would have infected vegetations at 24 h. These estimates, with an  $\alpha = 0.05$  and a power  $(1-\beta) = 0.8$  required a sample size of at least eight animals per group<sup>55</sup>.

*List of animals in groups.*

| Number of animals                  | Onset of treatment | Saline | Phage cocktail | Flucloxacillin | Phage cocktail + flucloxacillin |
|------------------------------------|--------------------|--------|----------------|----------------|---------------------------------|
| Considered                         | 10                 | 7      | 8              | 11             | 12                              |
| Dead after surgery                 | 0                  | 3      | 3              | 0              | 0                               |
| With not properly placed catheters | 2                  | 2      | 1              | 1              | 0                               |

#### **Determination of phage-resistance patterns of *S. aureus* clones recovered *in vivo*.**

The phage-resistance patterns of the clones recovered *in vivo* from the rat cardiac vegetations were determined with diluted drop test assays. Cardiac vegetation homogenates (100  $\mu$ L) were plated on TSA and incubated overnight at 37 °C. Two days later, single colonies were re-suspended in 5 mL fresh TSB and incubated overnight at 37 °C. Overnight bacterial cultures were mixed 1:100 with 15 mL of TSB soft-agar and poured into Petri dishes. The bacterial lawns were then spotted with 5  $\mu$ L of serial 10-fold dilutions of each phage suspension (vB\_SauH\_2002, phage 66, and the phage cocktail) and incubated at 37 °C overnight. The results were scored the next day according to the observed lysis phenotypes. Absence and presence of lysis were considered definitive of a resistant phenotype (R) and a susceptible phenotype (S), respectively (Fig. S1).

#### **Bacterial genome sequencing, assembly, and analysis.**

A bacterial genomic library was prepared with an optimized protocol and standard Illumina adapter sequences, and sequencing was performed with Illumina technology, NovaSeq 6000 (read mode 2 x 150 base pairs). Both processes were performed at Eurofins Genomics Germany GmbH (Ebersberg, Germany). Reads were assembled and contigs annotated using the PATRIC pipeline

for assembly and annotation, respectively (<https://www.patricbrc.org/>). Comparative genomics were performed with the PATRIC variation analysis tool set to default parameters.



**Table S1.** *S. aureus* strains used in this study along with their EOP scores for vB\_SauH\_2002 and phage 66.

| S. aureus strain                                      | Genbank access N° | ST  | EOP score    |                    | Covered by the phage cocktail | Reference                 |
|-------------------------------------------------------|-------------------|-----|--------------|--------------------|-------------------------------|---------------------------|
|                                                       |                   |     | vB_SauH_2002 | Phage 66           |                               |                           |
| <b>Human carriage strains from healthy volunteers</b> |                   |     |              |                    |                               |                           |
| Laus102                                               | JAETXI000000000.1 | 8   | 1            | 1                  | yes                           | 16                        |
| Laus385                                               | CP071350.1        | 8   | 1.5          | 1.25               | yes                           | 16                        |
| F60                                                   | NA                | 15  | 0.025        | 5.10 <sup>-4</sup> | yes                           | 56                        |
| <b>Human clinical strains</b>                         |                   |     |              |                    |                               |                           |
| VRS11b (AID1001123)*†                                 | AHBV01000000.1    | 5   | 0.35         | 0.225              | yes                           | 57                        |
| VRS8 (71080)*†                                        | AHBR00000000.1    | 5   | 0            | 0                  | no                            | 57                        |
| VRS9 (AIS080003)*†                                    | AHBS00000000.1    | 5   | 0            | 0.75               | yes                           | 57                        |
| VRS10 (AIS1000505)*†                                  | AHBT00000000.1    | 5   | 0.65         | 0                  | yes                           | 57                        |
| VRS11a (AIS1001095)*†                                 | AHBU00000000.1    | 5   | 0.15         | 0.075              | yes                           | 57                        |
| VRS6 (AIS2006032)*†                                   | AHBP00000000.1    | 5   | 0.025        | 0.2                | yes                           | 57                        |
| VRS7 (AIS2006045)*†                                   | AHBQ00000000.1    | 5   | 0.7          | 0                  | yes                           | 57                        |
| VRS4 (HIP14300)*†                                     | AHBN00000000.1    | 5   | 0.025        | 0.075              | yes                           | 57                        |
| VRS3b (HIP13419)*†                                    | AHBM00000000.1    | 5   | 0            | 0.9                | yes                           | 57                        |
| VRS2 (HIP11983)*†                                     | AHBL00000000.1    | 5   | 0            | 0                  | no                            | 57                        |
| VRS3a (HIP13170)*†                                    | NBCP00000000.1    | 5   | 0            | 1                  | yes                           | 57                        |
| VRS1 (HIP11714)*†                                     | AHBK00000000.1    | 5   | 0.35         | 0                  | yes                           | 57                        |
| VRS5 (HIP15178)*†                                     | AHBO00000000.1    | 5   | 0.7          | 0.25               | yes                           | 57                        |
| ATCC 29213                                            | LHUS00000000.2    | 5   | 0            | 0                  | no                            | Vicosa et al. unpublished |
| I37                                                   | CP071352.1        | 8   | 0.85         | 0.25               | yes                           | 16                        |
| USA300 FPR3747‡                                       | JAFFHX000000000.1 | 8   | 0            | 0.2                | yes                           | 58                        |
| USA300 JE2‡                                           | CP020619.1        | 8   | 0            | 0.8                | yes                           | 58                        |
| Yok80                                                 | NA                | 8   | 0.025        | 1                  | yes                           | This study                |
| Yok51                                                 | NA                | 22  | 1            | 0.075              | yes                           | This study                |
| Yok49                                                 | NA                | 30  | 1            | 0.25               | yes                           | This study                |
| Yok25                                                 | NA                | 45  | 0            | 0                  | no                            | This study                |
| Yok72‡                                                | NA                | 105 | 0.7          | 0.0125             | yes                           | This study                |
| Yok53                                                 | NA                | 121 | 0.75         | 5.10 <sup>-3</sup> | yes                           | This study                |
| AW10‡                                                 | NA                | 239 | 0            | 0.2                | yes                           | This study                |
| AW7‡                                                  | SRLL00000000.1    | 247 | 0.025        | 0.02               | yes                           | 59                        |
| COL‡                                                  | CP000046.1        | 250 | 0.35         | 0                  | yes                           | 60                        |
| Yok45                                                 | NA                | 707 | 0            | 0                  | no                            | This study                |

| <b>Animal strains from bovine mastitis</b> |            |      |              |                    |              |    |
|--------------------------------------------|------------|------|--------------|--------------------|--------------|----|
| Jn                                         | CP071362.1 | 8    | 0.025        | 0.03               | yes          | 61 |
| G04                                        | CP071369.1 | 8    | 0.5          | 0.125              | yes          | 61 |
| G36                                        | CP071366.1 | 8    | 0.8          | 0                  | yes          | 61 |
| G57                                        | CP071365.1 | 8    | 0.35         | 0                  | yes          | 61 |
| O103                                       | CP071360.1 | 8    | 0.6          | 0.25               | yes          | 61 |
| M160                                       | CP071341.1 | 8    | 0.6          | 0                  | yes          | 16 |
| M283                                       | CP071337.1 | 8    | 0.45         | 0                  | yes          | 16 |
| M186                                       | CP071340.1 | 8    | 0.85         | 0                  | yes          | 16 |
| M192                                       | CP071339.1 | 8    | 0.025        | 0                  | yes          | 16 |
| M385                                       | CP071333.1 | 8    | 0.45         | 0                  | yes          | 56 |
| M308                                       | CP071336.1 | 8    | 0.65         | 0                  | yes          | 16 |
| G03                                        | CP071370.1 | 8    | 0.025        | 0.25               | yes          | 61 |
| Bc                                         | CP071374.1 | 8    | 0.025        | 0.2                | yes          | 61 |
| O100                                       | CP071361.1 | 8    | 0.025        | 0.3                | yes          | 61 |
| Je                                         | CP071363.1 | 8    | 0.025        | 0.075              | yes          | 61 |
| G34                                        | CP071367.1 | 8    | 0.025        | 0                  | yes          | 61 |
| M222                                       | CP071338.1 | 8    | 0.025        | 0                  | yes          | 16 |
| M37                                        | CP071347.1 | 8    | 0.45         | 0.25               | yes          | 16 |
| M5                                         | CP071349.1 | 8    | 0.025        | 0                  | yes          | 16 |
| M20                                        | CP071348.1 | 8    | 0.45         | 1                  | yes          | 16 |
| M319                                       | CP071334.1 | 8    | 0.6          | 2                  | yes          | 16 |
| M313                                       | CP071335.1 | 8    | 0.6          | 0                  | yes          | 16 |
| M124                                       | CP071343.1 | 8    | 0.025        | 0                  | yes          | 16 |
| M117                                       | CP071344.1 | 8    | 0.35         | 0                  | yes          | 16 |
| M184                                       | NA         | 15   | 1            | 0                  | yes          | 56 |
| M356                                       | NA         | 71   | 0.025        | 0.25               | yes          | 16 |
| M159                                       | NA         | 389  | 0.025        | 4.10 <sup>-4</sup> | yes          | 16 |
| M323                                       | NA         | 389  | 0.025        | 0                  | yes          | 16 |
| M3                                         | NA         | 395  | 0.025        | 0.025              | yes          | 16 |
| M75                                        | NA         | 504  | 0.1          | 0.175              | yes          | 56 |
| M52                                        | NA         | 504  | 0.025        | 0.9                | yes          | 16 |
| M86                                        | CP071346.1 | 1650 | 0.6          | 0                  | yes          | 16 |
| M126                                       | NA         | 1651 | 0.025        | 3.5                | yes          | 16 |
| <b>% coverage</b>                          |            |      | <b>82.54</b> | <b>58.73</b>       | <b>92.06</b> |    |

ST, sequence type; EOP, efficiency of plating; NA, not available, \*see acknowledgements, †VRSA, ‡MRSA.

**Table S2.** Phage resistance patterns of clones recovered from the cardiac vegetations of rats treated with the phage cocktail/flucloxacillin combination for 24 h.

| Animal N° | CFU/g vegetations | Number of clones that regrew in TSB | Phage resistance pattern<br>(vB_SauH_2002, phage 66, phage cocktail) |     |
|-----------|-------------------|-------------------------------------|----------------------------------------------------------------------|-----|
|           |                   |                                     | SSS                                                                  | SRS |
| 16        | 5.4               | 21                                  | 14                                                                   | 6   |
| 18        | 3.5               | 15                                  | 9                                                                    | 7   |

S, susceptible; R, resistant.

**Table S3.** Results of the variant analysis conducted in PATRIC with default parameters between six representative SRS clones recovered from the vegetations of rats treated for 24 h with the phage cocktail/flucloxacillin combination and the Laus1002 wild-type SSS strain.

**Clone 16C1**

| <b>Non-synonymous mutations</b> |            |              |                          |                          |                   |                |                                                    |
|---------------------------------|------------|--------------|--------------------------|--------------------------|-------------------|----------------|----------------------------------------------------|
| <b>Contig</b>                   | <b>Pos</b> | <b>Score</b> | <b>Ref_nt</b>            | <b>Var_nt</b>            | <b>Frameshift</b> | <b>Gene N°</b> | <b>Function</b>                                    |
| 0001                            | 525680     | 5608.82      | gcc                      | gTc                      |                   | 496            | Transposase, IS4 family                            |
| 0001                            | 525813     | 75.7067      | agt                      | Ggt                      |                   | 496            | Transposase, IS4 family                            |
| 0005                            | 7195       | 525.68       | ggc                      | gTc                      |                   | 1625           | Transposase, IS4 family                            |
| 0005                            | 7258       | 844.719      | gat                      | gGt                      |                   | 1625           | Transposase, IS4 family                            |
| 0005                            | 7265       | 893.501      | tgt                      | Ggt                      |                   | 1625           | Transposase, IS4 family                            |
| 0009                            | 87601      | 3107.3       | cag                      | Gag                      |                   | 2210           | Transposase, IS4 family                            |
| 0009                            | 87676      | 8719.57      | aat                      | Gat                      |                   | 2210           | Transposase, IS4 family                            |
| 0009                            | 87780      | 13226.1      | aagaaagta                | AAGAAAAGta               | yes               | 2211           | Transposase, IS4 family                            |
| 0009                            | 87789      | 17524.8      | ttggtgcgg                | ttTGTGTgg                |                   | 2211           | Transposase, IS4 family                            |
| 0009                            | 87812      | 17154.9      | agt                      | aAt                      |                   | 2211           | Transposase, IS4 family                            |
| 0009                            | 87830      | 10619.7      | gataattcaatTTTTATTGATGGt | AATAATTCAATTTTTATTGATGGt |                   | 2211           | Transposase, IS4 family                            |
| 0009                            | 87885      | 8389.01      | ttctat                   | ttCCat                   |                   | 2211           | Transposase, IS4 family                            |
| 0009                            | 88220      | 2276.45      | atgacccaa                | TTGATCCAa                |                   | 2211           | Transposase, IS4 family                            |
| 0009                            | 88235      | 14505.1      | att                      | aAt                      |                   | 2211           | Transposase, IS4 family                            |
| 0010                            | 42336      | 648.986      | aaa                      | Gaa                      |                   | 2285           | Hypothetical protein, Lmo2313 homolog [phage A118] |
| <b>Synonymous mutations</b>     |            |              |                          |                          |                   |                |                                                    |
| 0001                            | 525712     | 6093.63      | att                      | atC                      |                   | 496            | Transposase, IS4 family                            |
| 0001                            | 525739     | 6269.44      | aag                      | aaA                      |                   | 496            | Transposase, IS4 family                            |
| 0001                            | 525793     | 1241.32      | aag                      | aaA                      |                   | 496            | Transposase, IS4 family                            |
| 0001                            | 525802     | 1663.27      | cgt                      | cgA                      |                   | 496            | Transposase, IS4 family                            |
| 0005                            | 7149       | 190.834      | ttc                      | ttT                      |                   | 1625           | Transposase, IS4 family                            |
| 0009                            | 87596      | 2442.06      | aat                      | aaC                      |                   | 2210           | Transposase, IS4 family                            |
| 0009                            | 87749      | 15295.7      | gag                      | gaA                      |                   | 2210           | Transposase, IS4 family                            |
| 0009                            | 88024      | 23007.5      | cga                      | cgT                      |                   | 2211           | Transposase, IS4 family                            |
| 0009                            | 88194      | 5005.21      | acctctggt                | acTTCTGtt                |                   | 2211           | Transposase, IS4 family                            |
| 0010                            | 42286      | 6078.02      | act                      | acG                      |                   | 2285           | Hypothetical protein, Lmo2313 homolog [phage A118] |

## Clone 16C5

| Non-synonymous mutations |        |         |                         |                          |            |         |                                                    |
|--------------------------|--------|---------|-------------------------|--------------------------|------------|---------|----------------------------------------------------|
| Contig                   | Pos    | Score   | Ref_nt                  | Var_nt                   | Frameshift | Gene_ID | Function                                           |
| 0001                     | 525680 | 8187.98 | gcc                     | gTc                      |            | 496     | Transposase, IS4 family                            |
| 0005                     | 7258   | 1721.74 | gat                     | gGt                      |            | 1625    | Transposase, IS4 family                            |
| 0005                     | 7265   | 1841.36 | tgt                     | Ggt                      |            | 1625    | Transposase, IS4 family                            |
| 0009                     | 87601  | 4777.89 | cag                     | Gag                      |            | 2210    | Transposase, IS4 family                            |
| 0009                     | 87676  | 11201.7 | aat                     | Gat                      |            | 2210    | Transposase, IS4 family                            |
| 0009                     | 87780  | 15992.4 | aagaaagta               | AAGAAAAGta               | yes        | 2211    | Transposase, IS4 family                            |
| 0009                     | 87789  | 20770.6 | ttggtgcgg               | ttTGTGTgg                |            | 2211    | Transposase, IS4 family                            |
| 0009                     | 87812  | 21642.7 | agt                     | aAt                      |            | 2211    | Transposase, IS4 family                            |
| 0009                     | 87830  | 11586.8 | gataattcaattttattgatggt | AATAATTCAATTTTTATTGATGGt |            | 2211    | Transposase, IS4 family                            |
| 0009                     | 87885  | 9779.11 | ttctat                  | ttCCat                   |            | 2211    | Transposase, IS4 family                            |
| 0009                     | 88220  | 1090.55 | atgacccaa               | TTGATCCAa                |            | 2211    | Transposase, IS4 family                            |
| 0009                     | 88235  | 17043.0 | att                     | aAt                      |            | 2211    | Transposase, IS4 family                            |
| Synonymous mutations     |        |         |                         |                          |            |         |                                                    |
| 0001                     | 525712 | 8026.6  | att                     | atC                      |            | 496     | Transposase, IS4 family                            |
| 0001                     | 525739 | 8395.65 | aag                     | aaA                      |            | 496     | Transposase, IS4 family                            |
| 0001                     | 525793 | 1329.23 | aag                     | aaA                      |            | 496     | Transposase, IS4 family                            |
| 0001                     | 525802 | 1760.09 | cgt                     | cgA                      |            | 496     | Transposase, IS4 family                            |
| 0009                     | 87596  | 3765.39 | aat                     | aaC                      |            | 2210    | Transposase, IS4 family                            |
| 0009                     | 87749  | 17038.1 | gag                     | gaA                      |            | 2210    | Transposase, IS4 family                            |
| 0009                     | 88024  | 21383.9 | cga                     | cgT                      |            | 2211    | Transposase, IS4 family                            |
| 0009                     | 88194  | 4571.23 | acctctggt               | acTTCTGtt                |            | 2211    | Transposase, IS4 family                            |
| 0010                     | 42286  | 2198.73 | act                     | acG                      |            | 2285    | Hypothetical protein, Lmo2313 homolog [phage A118] |

## Clone 16C8

| Non-synonymous mutations |               |                |                         |                          |            |             |                                                      |
|--------------------------|---------------|----------------|-------------------------|--------------------------|------------|-------------|------------------------------------------------------|
| Contig                   | Pos           | Score          | Ref_nt                  | Var_nt                   | Frameshift | Gene_ID     | Function                                             |
| 0001                     | 525680        | 5515.24        | gcc                     | gTc                      |            | 496         | Transposase, IS4 family                              |
| <b>0004</b>              | <b>150512</b> | <b>202.141</b> | <b>gattttataga</b>      | <b>gATTTTATAgA</b>       | <b>yes</b> | <b>1579</b> | <b>Glycosyl transferase family protein, putative</b> |
| 0005                     | 7258          | 4917.17        | gat                     | gGt                      |            | 1625        | Transposase, IS4 family                              |
| 0005                     | 7265          | 4599.85        | tgt                     | Ggt                      |            | 1625        | Transposase, IS4 family                              |
| 0009                     | 87601         | 6407.54        | cag                     | Gag                      |            | 2210        | Transposase, IS4 family                              |
| 0009                     | 87676         | 10902.8        | aat                     | Gat                      |            | 2210        | Transposase, IS4 family                              |
| 0009                     | 87780         | 16053.2        | aagaaagta               | AAGAAAAGta               | yes        | 2211        | Transposase, IS4 family                              |
| 0009                     | 87789         | 19560.9        | ttggtgcgg               | ttTGTGTgg                |            | 2211        | Transposase, IS4 family                              |
| 0009                     | 87812         | 20662.2        | agt                     | aAt                      |            | 2211        | Transposase, IS4 family                              |
| 0009                     | 87830         | 11884.0        | gataattcaattttattgatggt | AATAATTCAATTTTTATTGATGGt |            | 2211        | Transposase, IS4 family                              |
| 0009                     | 87885         | 9920.24        | ttctat                  | ttCCat                   |            | 2211        | Transposase, IS4 family                              |
| 0009                     | 88220         | 2783.96        | atgacccaa               | TTGATCCAA                |            | 2211        | Transposase, IS4 family                              |
| 0009                     | 88235         | 17981.6        | att                     | aAt                      |            | 2211        | Transposase, IS4 family                              |
| Synonymous mutations     |               |                |                         |                          |            |             |                                                      |
| 0001                     | 525712        | 7109.39        | att                     | atC                      |            | 496         | Transposase, IS4 family                              |
| 0001                     | 525739        | 7076.59        | aag                     | aaA                      |            | 496         | Transposase, IS4 family                              |
| 0001                     | 525793        | 2050.16        | aag                     | aaA                      |            | 496         | Transposase, IS4 family                              |
| 0001                     | 525802        | 1947.28        | cgt                     | cgA                      |            | 496         | Transposase, IS4 family                              |
| 0009                     | 87596         | 4990.44        | aat                     | aaC                      |            | 2210        | Transposase, IS4 family                              |
| 0009                     | 87749         | 17628.2        | gag                     | gaA                      |            | 2210        | Transposase, IS4 family                              |
| 0009                     | 88024         | 20936.6        | cga                     | cgT                      |            | 2211        | Transposase, IS4 family                              |
| 0009                     | 88194         | 5551.04        | acctctgtt               | acTTCTGtt                |            | 2211        | Transposase, IS4 family                              |
| 0010                     | 42286         | 3500.84        | act                     | acG                      |            | 2285        | Hypothetical protein, Lmo2313 homolog [phage A118]   |

## Clone 18C1

| Non-synonymous mutations |        |         |                          |                          |            |         |                         |
|--------------------------|--------|---------|--------------------------|--------------------------|------------|---------|-------------------------|
| Contig                   | Pos    | Score   | Ref_nt                   | Var_nt                   | Frameshift | Gene_ID | Function                |
| 0001                     | 525680 | 8604.29 | gcc                      | gTc                      |            | 496     | Transposase, IS4 family |
| 0005                     | 7258   | 262.335 | gat                      | gGt                      |            | 1625    | Transposase, IS4 family |
| 0005                     | 7265   | 822.581 | tgt                      | Ggt                      |            | 1625    | Transposase, IS4 family |
| 0009                     | 87601  | 5036.85 | cag                      | Gag                      |            | 2210    | Transposase, IS4 family |
| 0009                     | 87676  | 11688.4 | aat                      | Gat                      |            | 2210    | Transposase, IS4 family |
| 0009                     | 87780  | 15566.7 | aagaaagta                | AAGAAAAGta               | yes        | 2211    | Transposase, IS4 family |
| 0009                     | 87789  | 19603.4 | ttggtgcgg                | ttTGTGTgg                |            | 2211    | Transposase, IS4 family |
| 0009                     | 87812  | 20831.3 | agt                      | aAt                      |            | 2211    | Transposase, IS4 family |
| 0009                     | 87830  | 12640.3 | gataattcaatttttattgatggt | AATAATTCAATTTTTATTGATGGt |            | 2211    | Transposase, IS4 family |
| 0009                     | 87885  | 11079.3 | ttctat                   | ttCCat                   |            | 2211    | Transposase, IS4 family |
| 0009                     | 88235  | 16189.7 | att                      | aAt                      |            | 2211    | Transposase, IS4 family |
| Synonymous mutations     |        |         |                          |                          |            |         |                         |
| 0001                     | 525712 | 9596.15 | att                      | atC                      |            | 496     | Transposase, IS4 family |
| 0001                     | 525739 | 9276.65 | aag                      | aaA                      |            | 496     | Transposase, IS4 family |
| 0001                     | 525793 | 1566.82 | aag                      | aaA                      |            | 496     | Transposase, IS4 family |
| 0001                     | 525802 | 1189.01 | cgt                      | cgA                      |            | 496     | Transposase, IS4 family |
| 0009                     | 87596  | 3693.58 | aat                      | aaC                      |            | 2210    | Transposase, IS4 family |
| 0009                     | 87749  | 17536.0 | gag                      | gaA                      |            | 2210    | Transposase, IS4 family |
| 0009                     | 88024  | 24915.3 | cga                      | cgT                      |            | 2211    | Transposase, IS4 family |
| 0009                     | 88194  | 3408.42 | acctctgtt                | acTTCTGtt                |            | 2211    | Transposase, IS4 family |

## Clone 18C4

| Non-synonymous mutations |        |         |                         |                          |            |         |                                                    |
|--------------------------|--------|---------|-------------------------|--------------------------|------------|---------|----------------------------------------------------|
| Contig                   | Pos    | Score   | Ref_nt                  | Var_nt                   | Frameshift | Gene_ID | Function                                           |
| 0001                     | 525680 | 10276.0 | gcc                     | gTc                      |            | 496     | Transposase, IS4 family                            |
| 0005                     | 7258   | 1225.1  | gat                     | gGt                      |            | 1625    | Transposase, IS4 family                            |
| 0005                     | 7265   | 1314.05 | tgt                     | Ggt                      |            | 1625    | Transposase, IS4 family                            |
| 0009                     | 87601  | 3980.07 | cag                     | Gag                      |            | 2210    | Transposase, IS4 family                            |
| 0009                     | 87676  | 9695.14 | aat                     | Gat                      |            | 2210    | Transposase, IS4 family                            |
| 0009                     | 87780  | 13094.5 | aagaaagta               | AAGAAAAGta               | yes        | 2211    | Transposase, IS4 family                            |
| 0009                     | 87789  | 16499.0 | ttggtgcgg               | ttTGTGTgg                |            | 2211    | Transposase, IS4 family                            |
| 0009                     | 87812  | 15960.0 | agt                     | aAt                      |            | 2211    | Transposase, IS4 family                            |
| 0009                     | 87830  | 7869.22 | gataattcaattttattgatggt | AATAATTCAATTTTTATTGATGGt |            | 2211    | Transposase, IS4 family                            |
| 0009                     | 87885  | 7835.95 | ttctat                  | ttCCat                   |            | 2211    | Transposase, IS4 family                            |
| 0009                     | 88220  | 2190.76 | atgacccaa               | TTGATCCAa                |            | 2211    | Transposase, IS4 family                            |
| 0009                     | 88235  | 15953.5 | att                     | aAt                      |            | 2211    | Transposase, IS4 family                            |
| Synonymous mutations     |        |         |                         |                          |            |         |                                                    |
| 0001                     | 525712 | 10074.7 | att                     | atC                      |            | 496     | Transposase, IS4 family                            |
| 0001                     | 525739 | 8975.51 | aag                     | aaA                      |            | 496     | Transposase, IS4 family                            |
| 0001                     | 525793 | 1084.67 | aag                     | aaA                      |            | 496     | Transposase, IS4 family                            |
| 0001                     | 525802 | 1072.37 | cgt                     | cgA                      |            | 496     | Transposase, IS4 family                            |
| 0009                     | 87596  | 3262.71 | aat                     | aaC                      |            | 2210    | Transposase, IS4 family                            |
| 0009                     | 87749  | 14795.8 | gag                     | gaA                      |            | 2210    | Transposase, IS4 family                            |
| 0009                     | 88024  | 19495.9 | cga                     | cgT                      |            | 2211    | Transposase, IS4 family                            |
| 0009                     | 88194  | 5599.36 | acctctggt               | acTTCTGtt                |            | 2211    | Transposase, IS4 family                            |
| 0010                     | 42286  | 570.972 | act                     | acG                      |            | 2285    | Hypothetical protein, Lmo2313 homolog [phage A118] |



## Clone 18C10

| Non-synonymous mutations |        |         |                         |                          |            |         |                                                    |
|--------------------------|--------|---------|-------------------------|--------------------------|------------|---------|----------------------------------------------------|
| Contig                   | Pos    | Score   | Ref_nt                  | Var_nt                   | Frameshift | Gene_ID | Function                                           |
| 0001                     | 525680 | 5608.82 | gcc                     | gTc                      |            | 496     | Transposase, IS4 family                            |
| 0001                     | 525813 | 75.7067 | agt                     | Ggt                      |            | 496     | Transposase, IS4 family                            |
| 0005                     | 7195   | 525.68  | ggc                     | gTc                      |            | 1625    | Transposase, IS4 family                            |
| 0005                     | 7258   | 844.719 | gat                     | gGt                      |            | 1625    | Transposase, IS4 family                            |
| 0005                     | 7265   | 893.501 | tgt                     | Ggt                      |            | 1625    | Transposase, IS4 family                            |
| 0009                     | 87601  | 3107.3  | cag                     | Gag                      |            | 2210    | Transposase, IS4 family                            |
| 0009                     | 87676  | 8719.57 | aat                     | Gat                      |            | 2210    | Transposase, IS4 family                            |
| 0009                     | 87780  | 13226.1 | aagaaagta               | AAGAAAAGta               | yes        | 2211    | Transposase, IS4 family                            |
| 0009                     | 87789  | 17524.8 | ttggtgcgg               | ttTGTGTgg                |            | 2211    | Transposase, IS4 family                            |
| 0009                     | 87812  | 17154.9 | agt                     | aAt                      |            | 2211    | Transposase, IS4 family                            |
| 0009                     | 87830  | 10619.7 | gataattcaattttattgatggt | AATAATTCAATTTTTATTGATGGt |            | 2211    | Transposase, IS4 family                            |
| 0009                     | 87885  | 8389.01 | ttctat                  | ttCCat                   |            | 2211    | Transposase, IS4 family                            |
| 0009                     | 88220  | 2276.45 | atgacccaa               | TTGATCCAa                |            | 2211    | Transposase, IS4 family                            |
| 0009                     | 88235  | 14505.1 | att                     | aAt                      |            | 2211    | Transposase, IS4 family                            |
| 0010                     | 42336  | 648.986 | aaa                     | Gaa                      |            | 2285    | Hypothetical protein, Lmo2313 homolog [phage A118] |
| Synonymous mutations     |        |         |                         |                          |            |         |                                                    |
| 0001                     | 525712 | 6093.63 | att                     | atC                      |            | 496     | Transposase, IS4 family                            |
| 0001                     | 525739 | 6269.44 | aag                     | aaA                      |            | 496     | Transposase, IS4 family                            |
| 0001                     | 525793 | 1241.32 | aag                     | aaA                      |            | 496     | Transposase, IS4 family                            |
| 0001                     | 525802 | 1663.27 | cgt                     | cgA                      |            | 496     | Transposase, IS4 family                            |
| 0005                     | 7149   | 190.834 | ttc                     | ttT                      |            | 1625    | Transposase, IS4 family                            |
| 0009                     | 87596  | 2442.06 | aat                     | aaC                      |            | 2210    | Transposase, IS4 family                            |
| 0009                     | 87749  | 15295.7 | gag                     | gaA                      |            | 2210    | Transposase, IS4 family                            |
| 0009                     | 88024  | 23007.5 | cga                     | cgT                      |            | 2211    | Transposase, IS4 family                            |
| 0009                     | 88194  | 5005.21 | acctctggt               | acTTCTGtt                |            | 2211    | Transposase, IS4 family                            |
| 0010                     | 42286  | 6078.02 | act                     | acG                      |            | 2285    | Hypothetical protein, Lmo2313 homolog [phage A118] |

**Figure S1.** Images of representative patterns observed in diluted drop tests for *S. aureus* SSS and SRS clones isolated from the cardiac vegetations of rats treated with the phage cocktail/flucloxacillin combination for 24 h. **A.** Phage vB\_SauH\_2002. **B.** Phage 66. **C.** Phage cocktail. The SSS pattern observed with the wild-type (WT) strain Laus102 is indicated for comparison in the left panel. S, susceptible; R, resistant.

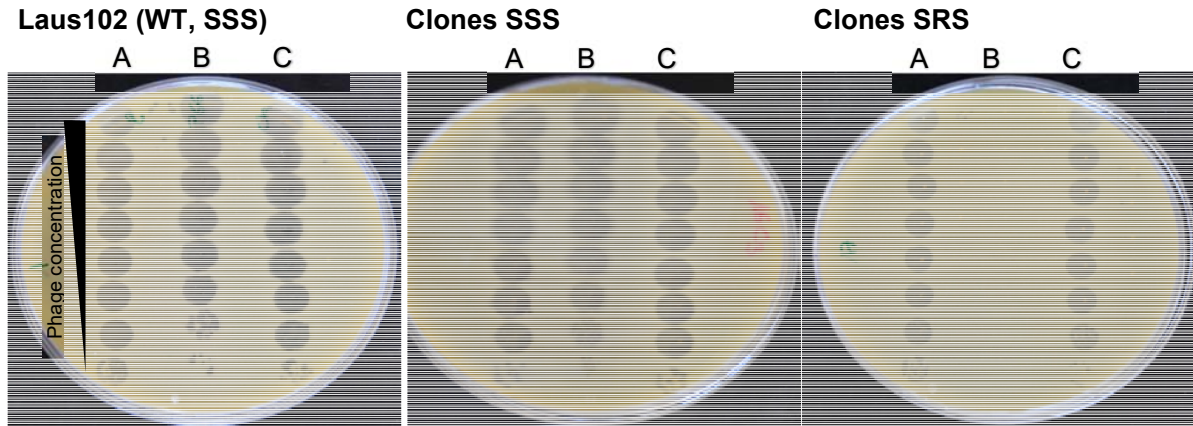

Supplement: JAH3-11-e023080-s001.pdf [file JAH3-11-e023080-s001.pdf]
